# Supplementary material for: Mutations in pmrB Confer Cross-Resistance between the LptD Inhibitor POL7080 and Colistin in Pseudomonas aeruginosa
Source: PubMed Central journal article supplement (PMC6709506; doi:10.1128/aac.00511-19), 2019-08-23
Supplement: AAC.00511-19-s0001.pdf [file AAC.00511-19-s0001.pdf]

## 1 Supplemental Materials

2

### 3 Selecting for POL7001 resistant mutants

4 PA14 (*Pseudomonas aeruginosa* UCBPP-PA14) cells were grown to mid-log phase (OD<sub>600</sub> 0.4–0.6) in  
5 Lysogeny Broth (LB). Cells were pelleted at room temperature with centrifugation (5000g, 10 minutes) and  
6 resuspended in LB to yield 1x10<sup>9</sup> CFU/mL (OD<sub>600</sub> 1.0). ~10<sup>8</sup> CFU were plated onto agar plates containing  
7 1.6µg/mL POL7001 (~4X the MIC on LB agar). Six resistant mutants were isolated after incubation at 37°C for  
8 16 hours, which were further grown in 5mL LB with 0.3µg/mL POL7001. Total DNA was extracted using the  
9 DNeasy Blood and Tissue Kit (Qiagen, Hilden Germany), and subsequently quantified using the High  
10 Sensitivity Quant-iT dsDNA Assay Kit (Thermo Fisher Scientific, Waltham MA). Indexed paired-end libraries  
11 were generated using the Nextera XT DNA library preparation kit (Illumina, San Diego CA). 25µL of index  
12 DNA libraries were mixed with 15µL Agencourt AMPure XP beads (Beckman Coulter, Pasadena CA) in a  
13 0.5mL deep well block (Thermo Fisher Scientific, Waltham MA), and after equilibrating on a 96S Super Magnet  
14 (Alpaqua Engineering, Beverly MA) for 2 minutes, the supernatants were removed. Samples were twice  
15 washed with 200µL of 80% (v/v) ethanol, and after drying on the magnet stand for 15 minutes, purified DNA  
16 was eluted with 25µL water. DNA quality and quantity were determined using the D5000 ScreenTape with the  
17 2200 TapeStation (Agilent, Santa Clara CA). Samples were diluted to a final concentration of 6.8ng/µL, and  
18 pooled for sequencing on the MiSeq instrument (Illumina, San Diego CA). Annotated reference genomes were  
19 obtained from [www.pseudomonas.com](http://www.pseudomonas.com)(1). Illumina reads were mapped to the PA14 genome and single  
20 nucleotide polymorphisms were identified using the Pilon program previously reported(2). All SNPs, including  
21 the *pmrB* mutation in the clinical isolate PA1571-*pmrB*<sub>G188D</sub>, were subsequently confirmed by Sanger  
22 sequencing.

23

### 24 MIC determination

25 All MIC experiments were conducted in biological triplicate in 384-well microplates (Nunc 384-well clear  
26 polystyrene plates, Thermo Fisher Scientific, Waltham MA) using the standard microdilution broth method  
27 adapted from previously published methods in Nature Protocols(3). For strains containing a second *pmrB* allele

28 at the attTn7 site, cultures were grown in the presence of 0.25% (v/v) arabinose. For colistin, meropenem,  
 29 piperacillin, and ceftazidime, 2-fold serial dilutions were performed in water at 200X the desired assay  
 30 concentrations, after which samples were diluted 1:100 into LB or MHB. For POL7001, POL7080, PG-1 and  
 31 TAMRA-L27-11, 2-fold serial dilutions were performed in dimethyl sulfoxide (DMSO) at 200X the desired assay  
 32 concentrations, after which samples were diluted 1:100 into LB or MHB. 30 $\mu$ L of serially diluted drug solutions  
 33 were mixed with equal volume mid-log bacterial culture to yield final conditions of 5x10<sup>5</sup> CFU/mL bacteria  
 34 (OD<sub>600</sub> 1.0 = 10<sup>9</sup> CFU/mL based on plate counts) with various drug concentrations. The final DMSO  
 35 concentration did not exceed 0.5% (v/v). Microplates were incubated in a humidity chamber without shaking  
 36 for 16 hours at 37°C, after which time the OD<sub>600</sub> was measured in the Spark Multimode Reader (Tecan,  
 37 Männedorf Switzerland). The clinical strain PA1571-*pmrB*<sub>G188D</sub>, previously reported to contain the PmrB  
 38 substitution G188D(4), displayed a growth delay and was thus allowed to grow for 30 hours in a humidity  
 39 chamber without shaking. Data were plotted and analyzed using GraphPad Prism8 software to determine the  
 40 MICs, defined as the minimal drug concentrations required for complete inhibition of bacterial growth. **Table S1**  
 41 summarizes the MIC data generated for PA14, the six POL7080-resistant mutants, and the clinical strain  
 42 PA1571-*pmrB*<sub>G188D</sub> in both LB and MHB. **Table S2** summarizes the activities of other conventional antibiotics  
 43 against these strains. **Table S3** contains the MIC data in LB with 0.25% arabinose after introducing a copy of  
 44 the mutant *pmrB* alleles at the attTn7 chromosomal site. **Table S4** shows the activity of TAMRA-L27-11  
 45 against PA14 and the resistant PA14-*pmrB*<sub>L172del</sub> mutant.

46

**Table S1: MICs against resistant mutants in MHB and LB. The fold-change relative to PA14 is shown in parentheses.**

| Strain                               | MIC ( $\mu$ g/mL) in MHB |           |           |           | MIC ( $\mu$ g/mL) in LB |          |           |           |
|--------------------------------------|--------------------------|-----------|-----------|-----------|-------------------------|----------|-----------|-----------|
|                                      | POL7001                  | POL7080   | PG-1      | Colistin  | POL7001                 | POL7080  | PG-1      | Colistin  |
| Wildtype PA14                        | 0.050                    | 0.050     | 1.3       | 0.44      | 0.10                    | 0.10     | 2.7       | 0.88      |
| PA14- <i>pmrB</i> <sub>L172del</sub> | 1.6 (32)                 | 1.6 (32)  | 43 (32)   | 14 (32)   | 1.6 (16)                | 3.2 (32) | >43 (>16) | 7.0 (8)   |
| PA14- <i>pmrB</i> <sub>G188S</sub>   | 0.40 (8)                 | 0.20 (4)  | 11 (8)    | 1.8 (4)   | 0.80 (8)                | 0.80 (8) | >43 (>16) | 3.5 (4)   |
| PA14- <i>pmrB</i> <sub>V136L</sub>   | 0.80 (16)                | 0.40 (8)  | >43 (>32) | 3.5 (8)   | 1.6 (16)                | 1.6 (16) | >43 (>16) | 3.5 (4)   |
| PA14- <i>pmrB</i> <sub>T132P</sub>   | 0.40 (8)                 | 0.40 (8)  | >43 (>32) | 3.5 (8)   | 1.6 (16)                | 1.6 (16) | >43 (>16) | 3.5 (4)   |
| PA14- <i>pmrB</i> <sub>R155H</sub>   | 1.6 (32)                 | 1.6 (32)  | >43 (>32) | 7.0 (16)  | 1.6 (16)                | 3.2 (32) | >43 (>16) | 3.5 (4)   |
| PA14- <i>pmrB</i> <sub>A330P</sub>   | 0.80 (16)                | 0.80 (16) | >43 (>32) | 3.5 (8)   | 1.6 (16)                | 3.2 (32) | >43 (>16) | 3.5 (4)   |
| PA1571- <i>pmrB</i> <sub>G188D</sub> | 0.20 (4)                 | 0.40 (8)  | 10.8 (8)  | >56 (>64) | 0.40 (4)                | 0.80 (8) | 22 (8)    | >56 (>64) |

47

48

**Table S2: MICs of conventional anti-pseudomonal antibiotics against PA14 and resistant mutants in MHB and LB. Fold-change relative to wildtype is shown in parentheses.**

| Strain                               | MIC ( $\mu\text{g/mL}$ ) in MHB |             |            | MIC ( $\mu\text{g/mL}$ ) in LB |             |           |
|--------------------------------------|---------------------------------|-------------|------------|--------------------------------|-------------|-----------|
|                                      | Piperacillin                    | Ceftazidime | Meropenem  | Piperacillin                   | Ceftazidime | Meropenem |
| Wildtype PA14                        | 2.7                             | 2.7         | 0.27       | 2.7                            | 2.7         | 0.55      |
| PA14- <i>pmrB</i> <sub>L172del</sub> | 1.3 (0.5)                       | 2.7 (1)     | 0.27 (1)   | 1.3 (0.5)                      | 2.7 (1)     | 0.55 (1)  |
| PA14- <i>pmrB</i> <sub>G188S</sub>   | 5.4 (2)                         | 5.4 (2)     | 0.27 (1)   | 5.4 (2)                        | 2.7 (1)     | 0.55 (1)  |
| PA14- <i>pmrB</i> <sub>V136L</sub>   | 2.7 (1)                         | 5.4 (2)     | 0.27 (1)   | 2.7 (1)                        | 2.7 (1)     | 0.55 (1)  |
| PA14- <i>pmrB</i> <sub>T132P</sub>   | 5.4 (2)                         | 5.4 (2)     | 0.27 (1)   | 5.4 (2)                        | 2.7 (1)     | 1.1 (2)   |
| PA14- <i>pmrB</i> <sub>R155H</sub>   | 2.7 (1)                         | 5.4 (2)     | 0.55 (2)   | 2.7 (1)                        | 2.7 (1)     | 1.1 (2)   |
| PA14- <i>pmrB</i> <sub>A330P</sub>   | 2.7 (1)                         | 5.4 (2)     | 0.27 (1)   | 2.7 (1)                        | 2.7 (1)     | 0.55 (1)  |
| PA1571- <i>pmrB</i> <sub>G188D</sub> | >43 (>16)                       | >43 (>16)   | >4.4 (>16) | >43.7 (>16)                    | >43.7 (>16) | 4.4 (>8)  |

50

**Table S3: MICs in LB with 0.25% arabinose after introduction of second *pmrB* alleles into PA14 and *pmrB*<sub>L172del</sub> backgrounds. The fold-change relative to the background strain is indicated in parentheses.**

| Background strain                    | attTn7 Allele                  | POL7080 MIC ( $\mu\text{g/mL}$ ) | Colistin MIC ( $\mu\text{g/mL}$ ) |
|--------------------------------------|--------------------------------|----------------------------------|-----------------------------------|
| PA14                                 | ---                            | 0.10                             | 0.88                              |
| PA14                                 | <i>pmrB</i> <sub>WT</sub>      | 0.20 (2)                         | 0.88 (1)                          |
| PA14                                 | <i>pmrB</i> <sub>L172del</sub> | 1.6 (16)                         | 3.5 (4)                           |
| PA14                                 | <i>pmrB</i> <sub>G188S</sub>   | 0.40 (4)                         | 1.8 (2)                           |
| PA14                                 | <i>pmrB</i> <sub>G188D</sub>   | 1.6 (16)                         | 7.0 (8)                           |
| PA14- <i>pmrB</i> <sub>L172del</sub> | ---                            | 3.2                              | 7.0                               |
| PA14- <i>pmrB</i> <sub>L172del</sub> | <i>pmrB</i> <sub>WT</sub>      | 1.6 (0.5)                        | 3.5 (0.5)                         |

51

**Table S4: MICs of TAMRA-L27-11 against PA14 and the resistant PA14-*pmrB*<sub>L172del</sub> mutant.**

| Strain                               | TAMRA-L27-11 MIC ( $\mu\text{g/mL}$ ) in MHB |
|--------------------------------------|----------------------------------------------|
| Wildtype PA14                        | 14                                           |
| PA14- <i>pmrB</i> <sub>L172del</sub> | >28                                          |

52

### 53 Introduction of *pmrB* alleles at the attTn7 chromosomal site

54 Copies of the wildtype *pmrB* allele, POL7080-resistant *pmrB* alleles L172del and G188S, and the colistin-  
 55 resistant *pmrB* allele G188D(4) were introduced into PA14 at the neutral, naturally-evolved attTn7  
 56 chromosomal site using the mini-Tn7 system described previously in *P. aeruginosa*(5). When possible, the  
 57 desired *pmrB* alleles were amplified from the genomic DNA of its corresponding mutant and inserted into the  
 58 pUC18-derived mini-Tn7 integration vector (with gentamicin cassette and AraC-*araBAD* promoter system)  
 59 using standard PCR and Gibson Assembly protocols (New England Biolabs, Ipswich MA)(6). The G188D  
 60 substitution was engineered into the wildtype PA14 *pmrB* mini-Tn7 integration vector using the Q5 Site-

61 Directed Mutagenesis Kit (New England Biolabs, Ipswich MA). Ultimately, each mini-Tn7 integration vector  
62 contained the desired *pmrB* allele (wildtype, L172del, G188S, or G188D) under control of the *AraC-araBAD*  
63 promoter(7), which encodes the *araC* repressor allowing for titratable *pmrB* gene expression in response to  
64 arabinose. After transformation into 10-beta *Escherichia coli* (New England Biolabs, Ipswich MA), bacterial  
65 conjugation was performed on cellulose membranes by spotting 20 $\mu$ L of a 1:2:2:2 mixture of the recipient  
66 strain (PA14 or PA14-*pmrB*<sub>172del</sub>), 10-beta cells harboring the desired *pmrB* integration vector, and helper  
67 strains pRK2013 and pTNS3 (encoding the machinery necessary for pseudomonal plasmid uptake and  
68 subsequent integration at the attTn7 site). After mating at 37°C for 10 hours, cells were resuspended in 400 $\mu$ L  
69 LB and selected on LB agar containing 30 $\mu$ g/mL gentamicin and 15 $\mu$ g/mL irgasan, permitting growth of only  
70 PA14 cells containing the *pmrB* gene (and gentamicin cassette). Colonies were isolated and *pmrB* gene inserts  
71 were confirmed by fragment sizing after colony PCR. PCR products of the appropriate size were also  
72 recovered using the Gel Extraction Kit (Qiagen, Hilden Germany) and confirmed by sequencing.

73

#### 74 **RNAseq experiments**

75 RNAseq experiments were carried out in biological triplicate in 384-well microplates (Nunc 384-well clear  
76 polystyrene plates, Thermo Fisher Scientific, Waltham MA). POL7001 was dissolved in DMSO at 200X the  
77 working concentration, and then diluted 1:100 into LB, yielding 2X drug solution in 1% (v/v) DMSO in LB.  
78 PA14 cultures were grown with shaking (37°C, 250rpm) to mid-log phase, and 30 $\mu$ L of cultures were mixed  
79 with equal volume of 2X POL7001 solution, yielding final conditions containing of 2x10<sup>8</sup> CFU/mL PA14 with  
80 0.2 $\mu$ g/mL POL7001 in 0.5% (v/v) DMSO in LB. Cells were treated at 37°C for 100 minutes without shaking in a  
81 humidity chamber. Samples were then mixed with 30 $\mu$ L of 3X RNAgem Blue Buffer (Zygem, Charlottesville  
82 VA), and chemically lysed by incubation in a thermocycler at 75°C for 10 minutes. Total RNA was then  
83 extracted using the Direct-zol kit (Zymo Research, Irvin CA), and RNA quality and quantity were analyzed  
84 using the RNA ScreenTape with the 2200 TapeStation (Agilent, Santa Clara CA). RNA-seq libraries were  
85 prepared using the RNA TagSeq protocol previously described(8), and samples were sequenced samples on a  
86 NextSeq instrument (Illumina, San Diego CA). Transcriptional data were analyzed using the Burrows-Wheeler  
87 Aligner(9) for alignment and DESeq2(10) to determine genes differentially expressed.

## 88 qRT-PCR experiments

89 qRT-PCR experiments were carried out in biological triplicate in a Nunc 96-well 2mL Deep Well Block (Thermo  
90 Fisher Scientific, Waltham MA). POL7080 was dissolved in DMSO at 200X the working concentration, and  
91 then diluted 1:100 into LB, yielding 2X drug solution in 1% (v/v) DMSO in LB. PA14 and resistant PA14-  
92 *pmrB*<sub>L172del</sub> cultures were grown with shaking (37°C, 250rpm) to mid-log phase in LB. 125µL of mid-log  
93 cultures were mixed with equal volume of either 2X POL7080 solution or 1% DMSO vehicle control, yielding  
94 final conditions containing of  $2 \times 10^8$  CFU/mL bacteria with 0.2µg/mL or 0µg/mL POL7080 in 0.5% (v/v) DMSO  
95 in LB. Cells were treated at 37°C for 100 minutes without shaking in a humidity chamber. Samples were then  
96 pelleted by centrifugation (5,000g, 10 minutes), and 150µL of supernatant was discarded. After resuspension  
97 in the remaining supernatant, 90µL of culture were transferred to an Axygen 96-well PCR plate (Corning  
98 Incorporated, Corning NY), containing 10µL of 10X RNAgem Blue Buffer (Zygem, Charlottesville VA).  
99 Chemically lysis was performed by incubation in a thermocycler at 75°C for 10 minutes. Total RNA was then  
100 extracted using the Direct-zol kit (Zymo Research, Irvin CA), and RNA quality and quantity were analyzed  
101 using the RNA ScreenTape with the 2200 TapeStation (Agilent, Santa Clara CA). Complementary DNA  
102 (cDNA) libraries were generated using the qScript cDNA synthesis kit (QuantaBio, Beverly MA). All qRT-PCR  
103 reactions were carried with the ViiA 7 Real-Time PCR system (Applied Biosystems, Foster City CA). Primer  
104 pairs were designed for *pmrA*, *arnB*, *pagL* and *rpoD* genes and purchased from Integrated DNA Technologies  
105 (**Table S5**). cDNA, primer pairs, and iTaq Universal SYBR Green Supermix (Bio-Rad Laboratories) were mixed  
106 according to the iTaq Universal SYBR Green Supermix protocol. 10µL of PCR reaction mixtures were  
107 transferred to 384-well thin-wall hard-shell PCR plates (Bio-Rad Laboratories, Hercules CA). Cycle conditions  
108 were based on the iTaq SYBR Green mix protocol for the BIO-RAD CFX384 system as follows: polymerase  
109 activation and DNA denaturation at 95°C for 20 seconds for cDNA, or 5 minutes for genomic DNA; 40 cycles  
110 for amplification (denaturation at 95°C for 5 seconds, followed by annealing at 63°C for 30 seconds, followed  
111 by extension at 72°C for 2 minutes). A series of seven 10-fold dilutions of PA14 control genomic DNA (initial  
112 stock at 40ng/µL) were performed, and standard curves were generated as previously described to determine  
113 the conversion factor of DNA copies per PCR reaction, assuming 1ng of PA14 genomic DNA equaled  $1.4 \times 10^5$   
114 DNA copies(11, 12). For analysis, gene transcript levels were normalized to those of the housekeeping *rpoD*

115 gene, and subsequently normalized by untreated PA14 transcript levels to determine fold-change in gene  
116 expression relative to untreated PA14.

| Gene        | Forward Primer       | Reverse Primer       |
|-------------|----------------------|----------------------|
| <i>pmrA</i> | AAGGCGATACCGTGGAATG  | CAGGTTGCGCAGGATGT    |
| <i>arnB</i> | CTGGCACCTGTTCATCCTG  | AGGTGACTGGCGATGAAATG |
| <i>pagL</i> | GATGCGGGCTACACCTATTG | GCCTCGATGAATGGCTTGAT |
| <i>rpoD</i> | GATTTCCATCGCCAAGAAGT | CACGACGGTATTCGAACTTG |

117

## 118 **Synthesis of TAMRA-modified cyclic peptide L27-11 (TAMRA-L27-11)**

### 119 *Synthesis of parent peptide*

120 The parent cyclic peptide L27-11 was synthesized mostly as previously described(13). The uncyclized linear  
121 peptide was prepared by a combination of batch synthesis and manual flow peptide synthesis (N<sup>α</sup>-Fmoc-  
122 protected amino acids from Chem-Impex International)(14). Except where specified, all reagents in this  
123 procedure were purchased from Sigma-Aldrich. In batch, Fmoc-L-Pro-OH (1mmol) was coupled to 150 mg 2-  
124 chlorotriyl chloride polystyrene resin (200–400 mesh, loading: 1.14mmol/g, Chem-Impex International) in the  
125 presence of diisopropylethylamine (DIEA, 0.3mL) in dichloromethane (DCM, 2.5mL). Manual flow peptide  
126 synthesis followed the standard 3-minute cycle at 60°C previously described. Initial deprotection of N<sup>α</sup>-Fmoc  
127 was performed with 6.6mL 20% (v/v) piperidine in N,N-dimethylformamide (DMF) delivered at 20mL/min over  
128 20 seconds. Subsequent coupling was performed by delivering 1mmol Fmoc-Xaa dissolved in 2.5mL of 0.4M  
129 2-(7-Aza-1H-benzotriazole-1-yl)-1,1,3,3-tetramethyluronium hexafluorophosphate (HATU, Chem-Impex  
130 International) in DMF and 0.5mL DIEA. Between coupling and deprotection steps, resin was washed for 1  
131 minute by delivering 20mL of DMF at 20mL/min. Final amino acid coupling was performed in batch. Fmoc-N<sup>ε</sup>-  
132 azide-L-Lysine-OH (1mmol) was dissolved in 2.5 mL of 0.4M HATU in DMF and 0.5mL DIEA, and added to  
133 resin. Subsequent Fmoc deprotection was performed by addition of 20% (v/v) piperidine in DMF (5mL).  
134 Cleavage from resin was performed via addition of 1% (v/v) TFA in DCM for 5 minutes. The eluate was  
135 transferred and neutralized with 1mL DIEA. Cleavage and neutralization was performed twice. Solvent was  
136 then removed under high vacuum. To cyclize, the resulting side-chain protected linear peptide was  
137 resuspended in DMF (85mL), and HATU (1mmol, 6 eq.), 1-hydroxy-7-azabenzotriazole (HOAt, 1mmol, 6 eq.,  
138 Chem-Impex International), and 2,4,6-collidine (2.6mmol, 15 eq.) were added. The reaction was stirred for 72

139 hours, and DMF was then removed under high vacuum. Crude cyclic peptide was resuspended in DCM  
140 (20mL) and washed with 10% (v/v) acetonitrile (MeCN) in water containing 0.1% trifluoroacetic acid (TFA)  
141 twice. DCM fraction was transferred to a new vessel and DCM was removed under high vacuum. Crude cyclic  
142 peptide was then subjected to global deprotection via resuspension in TFA/thioanisole/water/phenol/1,2-  
143 ethanedithiol (82.5:5:5:5:2.5 v/v, 5mL) and incubation at room temperature for 2 hours. Deprotected peptide  
144 was precipitated from cleavage solution via trituration with ice cold diisopropyl ether. Crude cyclic peptide was  
145 washed twice with ice cold diisopropyl ether, dried, and conjugated to tetramethyl rhodamine (TAMRA).  
146 *Fluorophore conjugation and purification of TAMRA-L27-11*  
147 Crude parent peptide was conjugated to TAMRA using strain-promoted copper-free azide-alkyne click  
148 chemistry. Azide-containing parent peptide L27-11 (3mg) was resuspended in 1X phosphate buffered saline  
149 (PBS), and dibenzocyclooctyne-PEG4-TAMRA (3 mg, 2 eq., Sigma-Aldrich) resuspended in 5% (v/v) DMSO in  
150 1X PBS was added to peptide, and mixture was incubated at room temperature for 2 hours. Reaction was  
151 then purified by preparative RP-HPLC (Agilent Zorbax SB C3 column: 9.4 x 250mm, 5 $\mu$ m) with a gradient of 5-  
152 55% MeCN in water with 0.1% TFA, run at 0.5% B/min. Pure fractions were pooled and lyophilized, and final  
153 purity was confirmed by LC-MS (**Figure S1**).

154

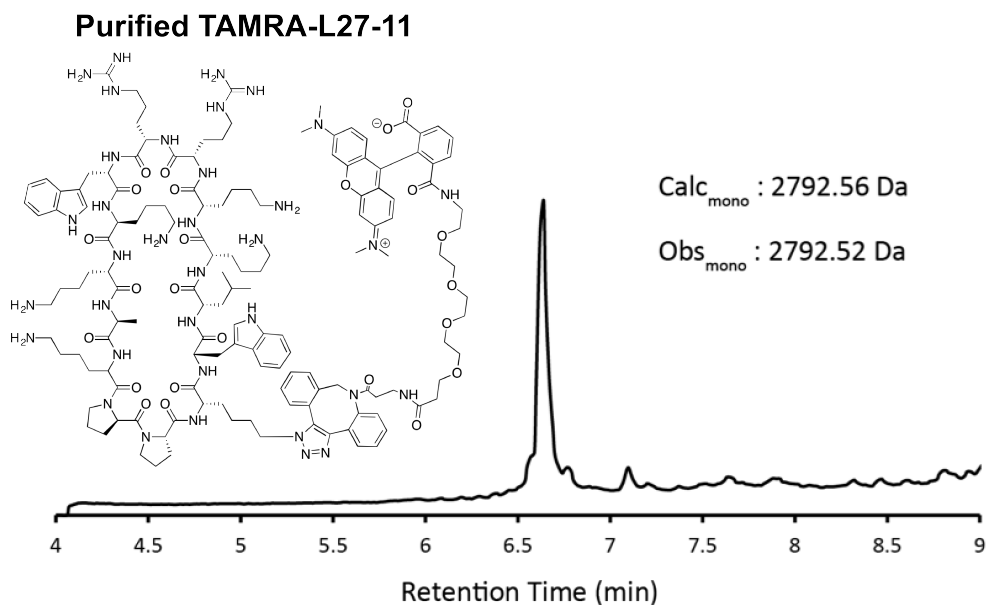

155

156 **Figure S1. Chemical structure and LC-MS analysis of RP-HPLC purified TAMRA-modified cyclic peptide**  
157 **L27-11.** Calculated and observed masses are monoisotopic, with total ion chromatogram shown.

## 158 **Confocal Microscopy**

159 PA14 and PA14-*pmrB*<sub>L172del</sub> cultures were grown with shaking (37°C, 250rpm) to mid-log phase in LB.

160 TAMRA-L27-11 was dissolved in DMSO at 200X the working concentration, and then diluted 1:100 into LB,  
161 yielding 2X TAMRA-L27-11 solution in LB with 1% (v/v) DMSO. 500µL of mid-log bacteria were mixed in  
162 culture tubes with equal volume of TAMRA-L27-11 to yield a final bacterial concentration of 1x10<sup>8</sup> CFU/mL in  
163 1.4µg/mL TAMRA-L27-11 in LB with 0.5% (v/v) DMSO. After incubation with shaking (37°C, 250rpm) in the  
164 dark for 120 minutes, cells were pelleted and twice washed with PBS. All wash steps were carried out at room  
165 temperature by resuspension in 500µL PBS, centrifugation (4000g, 10 minutes), and careful removal of the  
166 supernatant without pellet disruption. Cells were next fixed by treatment with 4% (v/v) paraformaldehyde in  
167 PBS in the dark for 30 minutes on ice. Cells were washed once with PBS, resuspended in 100µL of 100µM  
168 4',6-diamidino-2-phenylindole (DAPI) dissolved in PBS, and incubated at room temperature for 20 minutes in  
169 the dark. Cells were again washed and resuspended in 20µL PBS. On clean microscope slides, 1µL of fixed  
170 cells were mixed with 5µL of ProLong Gold Antifade Reagent (Invitrogen, Carlsbad CA). Cover slips were  
171 applied and the samples were allowed to dry in the dark at room temperature for at least 24 hours. Blue and  
172 red-field confocal microscopy images were collected using the Zeiss Confocal Microscope. For analysis, the  
173 average intensities of about 20 cells were quantified using ImageJ software to calculate mean DAPI and  
174 TAMRA fluorescence intensities of PA14 and PA14-*pmrB*<sub>L172del</sub> after TAMRA-L27-11 treatment.



175 **Supplemental References:**

- 176 1. Winsor GL, Griffiths EJ, Lo R, Dhillon BK, Shay JA, Brinkman FS. 2016. Enhanced annotations and  
177 features for comparing thousands of *Pseudomonas* genomes in the *Pseudomonas* genome database.  
178 *Nucleic Acids Res* 44:D646-53.
- 179 2. Walker BJ, Abeel T, Shea T, Priest M, Abouelliel A, Sakthikumar S, Cuomo CA, Zeng Q, Wortman J,  
180 Young SK, Earl AM. 2014. Pilon: an integrated tool for comprehensive microbial variant detection and  
181 genome assembly improvement. *PLoS One* 9:e112963.
- 182 3. Wiegand I, Hilpert K, Hancock RE. 2008. Agar and broth dilution methods to determine the minimal  
183 inhibitory concentration (MIC) of antimicrobial substances. *Nat Protoc* 3:163-75.
- 184 4. Moskowitz SM, Brannon MK, Dasgupta N, Pier M, Sgambati N, Miller AK, Selgrade SE, Miller SI,  
185 Denton M, Conway SP, Johansen HK, Hoiby N. 2012. PmrB mutations promote polymyxin resistance  
186 of *Pseudomonas aeruginosa* isolated from colistin-treated cystic fibrosis patients. *Antimicrob Agents*  
187 *Chemother* 56:1019-30.
- 188 5. Choi KH, Schweizer HP. 2006. mini-Tn7 insertion in bacteria with single attTn7 sites: example  
189 *Pseudomonas aeruginosa*. *Nat Protoc* 1:153-61.
- 190 6. Gibson DG, Young L, Chuang RY, Venter JC, Hutchison CA, 3rd, Smith HO. 2009. Enzymatic  
191 assembly of DNA molecules up to several hundred kilobases. *Nat Methods* 6:343-5.
- 192 7. Wycuff DR, Matthews KS. 2000. Generation of an AraC-araBAD promoter-regulated T7 expression  
193 system. *Anal Biochem* 277:67-73.
- 194 8. Shishkin AA, Giannoukos G, Kucukural A, Ciulla D, Busby M, Surka C, Chen J, Bhattacharyya RP,  
195 Rudy RF, Patel MM, Novod N, Hung DT, Gnrke A, Garber M, Guttman M, Livny J. 2015. Simultaneous  
196 generation of many RNA-seq libraries in a single reaction. *Nat Methods* 12:323-5.
- 197 9. Li H, Durbin R. 2009. Fast and accurate short read alignment with Burrows-Wheeler transform.  
198 *Bioinformatics* 25:1754-60.
- 199 10. Love MI, Huber W, Anders S. 2014. Moderated estimation of fold change and dispersion for RNA-seq  
200 data with DESeq2. *Genome Biol* 15:550.
- 201 11. Nolan T, Hands RE, Bustin SA. 2006. Quantification of mRNA using real-time RT-PCR. *Nat Protoc*  
202 1:1559-82.
- 203 12. Larionov A, Krause A, Miller W. 2005. A standard curve based method for relative real time PCR data  
204 processing. *BMC Bioinformatics* 6:62.
- 205 13. Srinivas N, Jetter P, Ueberbacher BJ, Werneburg M, Zerbe K, Steinmann J, Van der Meijden B,  
206 Bernardini F, Lederer A, Dias RL, Misson PE, Henze H, Zumbunn J, Gombert FO, Obrecht D,  
207 Hunziker P, Schauer S, Ziegler U, Kach A, Eberl L, Riedel K, DeMarco SJ, Robinson JA. 2010.  
208 Peptidomimetic antibiotics target outer-membrane biogenesis in *Pseudomonas aeruginosa*. *Science*  
209 327:1010-3.
- 210 14. Simon MD, Heider PL, Adamo A, Vinogradov AA, Mong SK, Li X, Berger T, Policarpo RL, Zhang C,  
211 Zou Y, Liao X, Spokoyny AM, Jensen KF, Pentelute BL. 2014. Rapid flow-based peptide synthesis.  
212 *ChemBiochem* 15:713-20.
- 213
